# Supplementary material for: On enhancing the Li-ion conductivity of quasi-solid-state electrolytes by suppressing the flexibility of zeolitic imidazolate framework-8 via a mixed ligand strategy
Source: Royal Society of Chemistry journal article supplement (doi:10.1039/d2cp05811a), 2023-01-01
Supplement: d2cp05811a1.pdf [file d2cp05811a1.pdf]

## On Enhancing the Li-Ion Conductivity of Poly (ethylene oxide) based Electrolytes by suppressing the flexibility of Zeolitic Imidazolate Framework-8 via mixed ligand strategy

P. Utpalla<sup>1,2</sup>, J. Mor<sup>1</sup>, S. K. Sharma<sup>1,2\*</sup>

<sup>1</sup>Radiochemistry Division, Bhabha Atomic Research Centre, Mumbai, India 400 085

<sup>2</sup>Homi Bhabha National Institute, Mumbai, India 400 094

### Content

#### 1. Experimental methods and characterizations

**Figure S1:** XRD patterns of the ZIF-7<sub>x</sub>-8 ( $x = 0, 22.1, 52.6$  and  $97.2\%$ ) frameworks

**Figure S2:** FE-SEM images of ZIF-7<sub>x</sub>-8 ( $x = 0, 22.1, 52.6$  and  $97.2\%$ ) frameworks

**Figure S3:** Pore sizes of ZIF-7<sub>x</sub>-8 ( $x = 0, 22.1, 52.6$  and  $97.2\%$ ) frameworks determined using PALS

**Figure S4:** Enlarged finger print region of FTIR spectra of PEO-Li and all the QSSEs.

**Figure S5:** FE-SEM images of (a) ZIF-7<sub>0</sub>-8 and (b) ZIF-7<sub>97.2</sub>-8.

**Figure S6.** Real part ( $\epsilon'$ ) of the complex permittivity for (a) PEO-Li (b) PEO-Li-ZIF-7<sub>0</sub>-8 (c) PEO-Li-ZIF-7<sub>22.1</sub>-8 (d) PEO-Li-ZIF-7<sub>52.6</sub>-8.

**Figure S7.** Imaginary part ( $\epsilon''$ ) of the complex permittivity for (a) PEO-Li (b) PEO-Li-ZIF-7<sub>0</sub>-8 (c) PEO-Li-ZIF-7<sub>22.1</sub>-8 (d) PEO-Li-ZIF-7<sub>52.6</sub>-8 (e) PEO-Li-ZIF-7<sub>97.2</sub>-8.

**Figure S8.** dc conduction free dielectric permittivity for (a) PEO-Li (b) PEO-Li-ZIF-7<sub>0</sub>-8 (c) PEO-Li-ZIF-7<sub>22.1</sub>-8 (d) PEO-Li-ZIF-7<sub>52.6</sub>-8 (e) PEO-Li-ZIF-7<sub>97.2</sub>-8 QSSEs. Solid lines show the fit of experimental data using HN formalism.

**Figure S9:** Real part of the conductivity ( $\sigma'$ ) variation with frequency (a) PEO-Li (b) PEO-Li-ZIF-7<sub>0</sub>-8 (c) PEO-Li-ZIF-7<sub>22.1</sub>-8 (d) PEO-Li-ZIF-7<sub>52.6</sub>-8 QSSEs.

**Figure S10.** Imaginary part of modulus,  $M''$ , variation with frequency for (a) PEO-Li (b) PEO-Li-ZIF-7<sub>0</sub>-8 (c) PEO-Li-ZIF-7<sub>22.1</sub>-8 (d) PEO-Li-ZIF-7<sub>52.6</sub>-8

**Figure S11.** Master curve by maxima normalization technique (a) PEO-Li (b) PEO-Li-ZIF-7<sub>0</sub>-8 (c) PEO-Li-ZIF-7<sub>22.1</sub>-8 (d) PEO-Li-ZIF-7<sub>52.6</sub>-8.

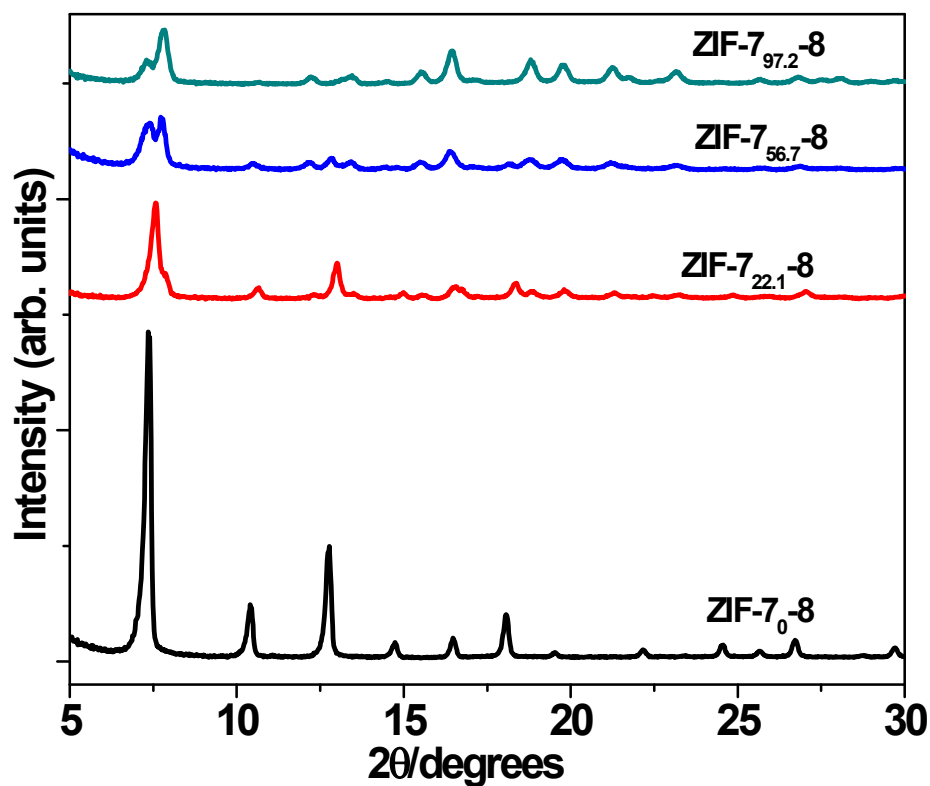

**Figure S1:** XRD patterns of the mixed ligand  $\text{ZIF-7}_x\text{-8}$  ( $x = 0, 22.1, 52.6$  and  $97.2\%$ ) frameworks. With the increase in bIm ligand, topology of the frameworks changes from ZIF-8 to ZIF-7. The random distribution of both ligands in the framework throughout the ligand mixing ratio has been confirmed in our previous study [S1].

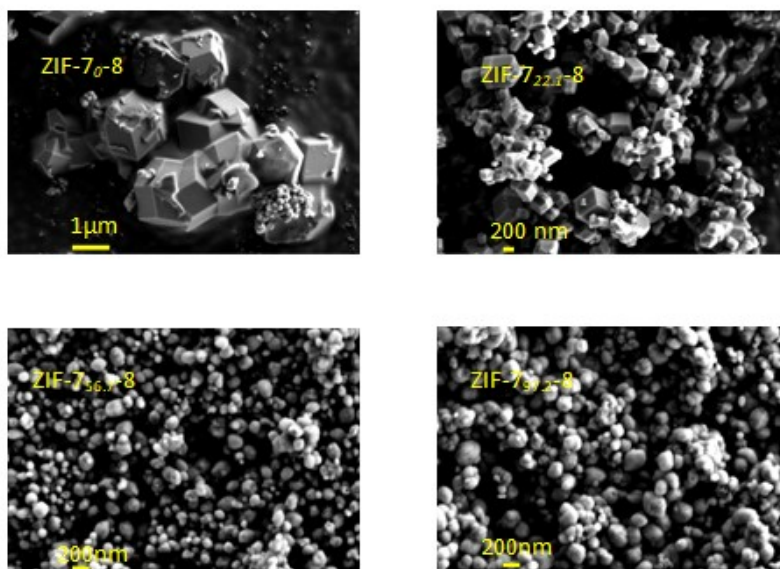

**Figure S2:** FE-SEM morphology of the mixed ligand ZIF-7<sub>x</sub>-8 (x = 0, 22.1, 52.6 and 97.2%) frameworks.

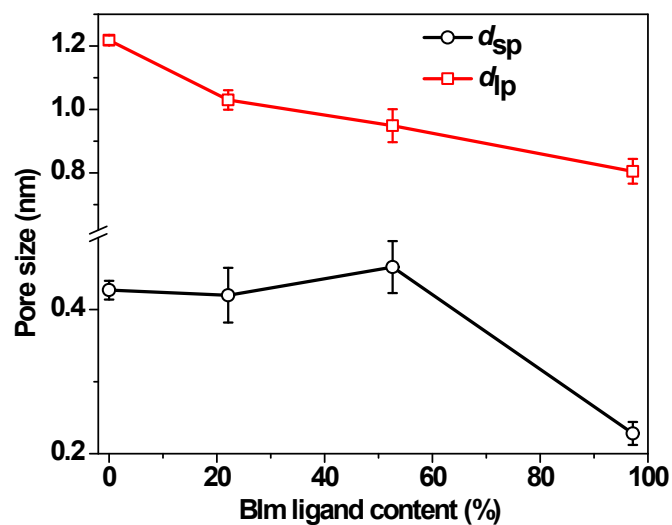

**Figure S3:** Pore sizes corresponding to aperture ( $d_{sp}$ ) and cavity ( $d_{lp}$ ) of the mixed ligand frameworks determined using PALS. The details can be found elsewhere [S1].

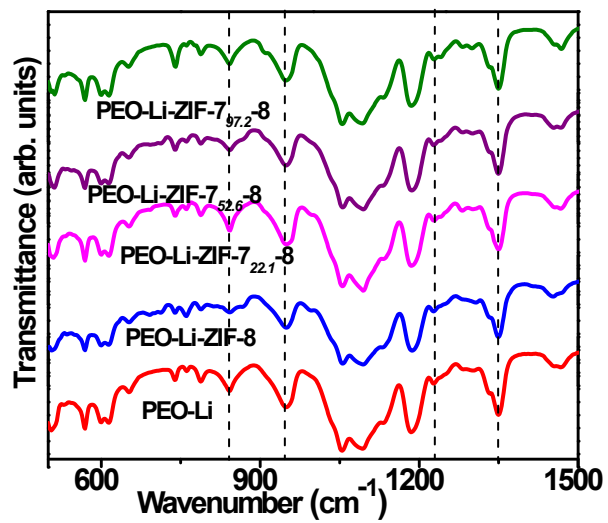

**Figure S4:** Enlarged finger print region of FTIR spectra of PEO-Li and all the QSSEs

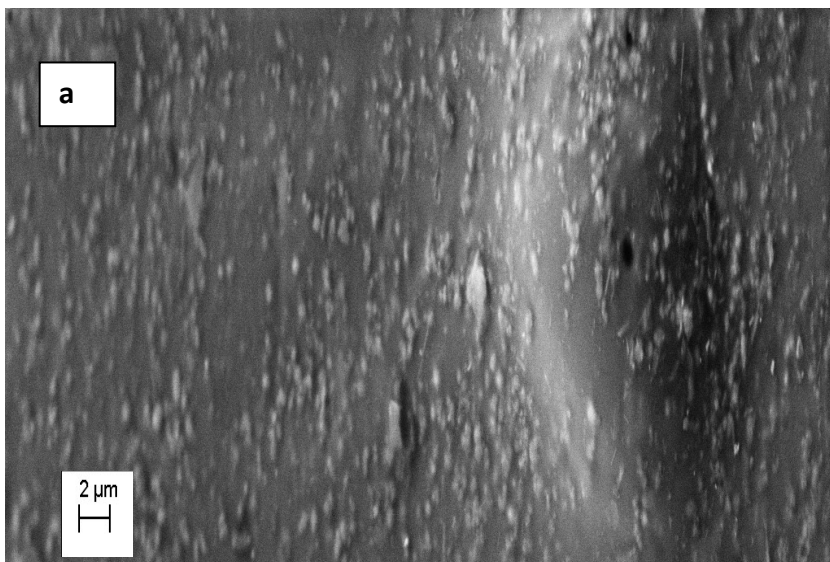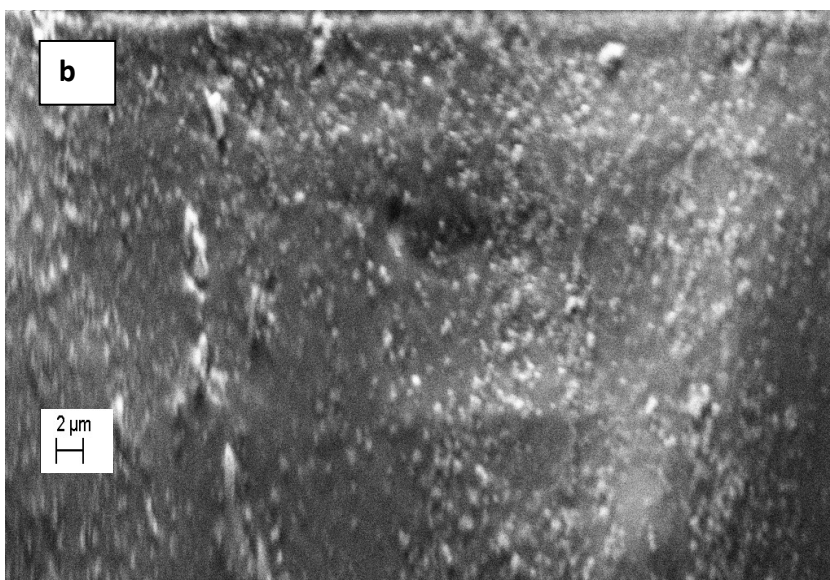

**Figure S5:** FE-SEM images of (a) ZIF-7<sub>0</sub>-8 and (b) ZIF-7<sub>97.2</sub>-8.

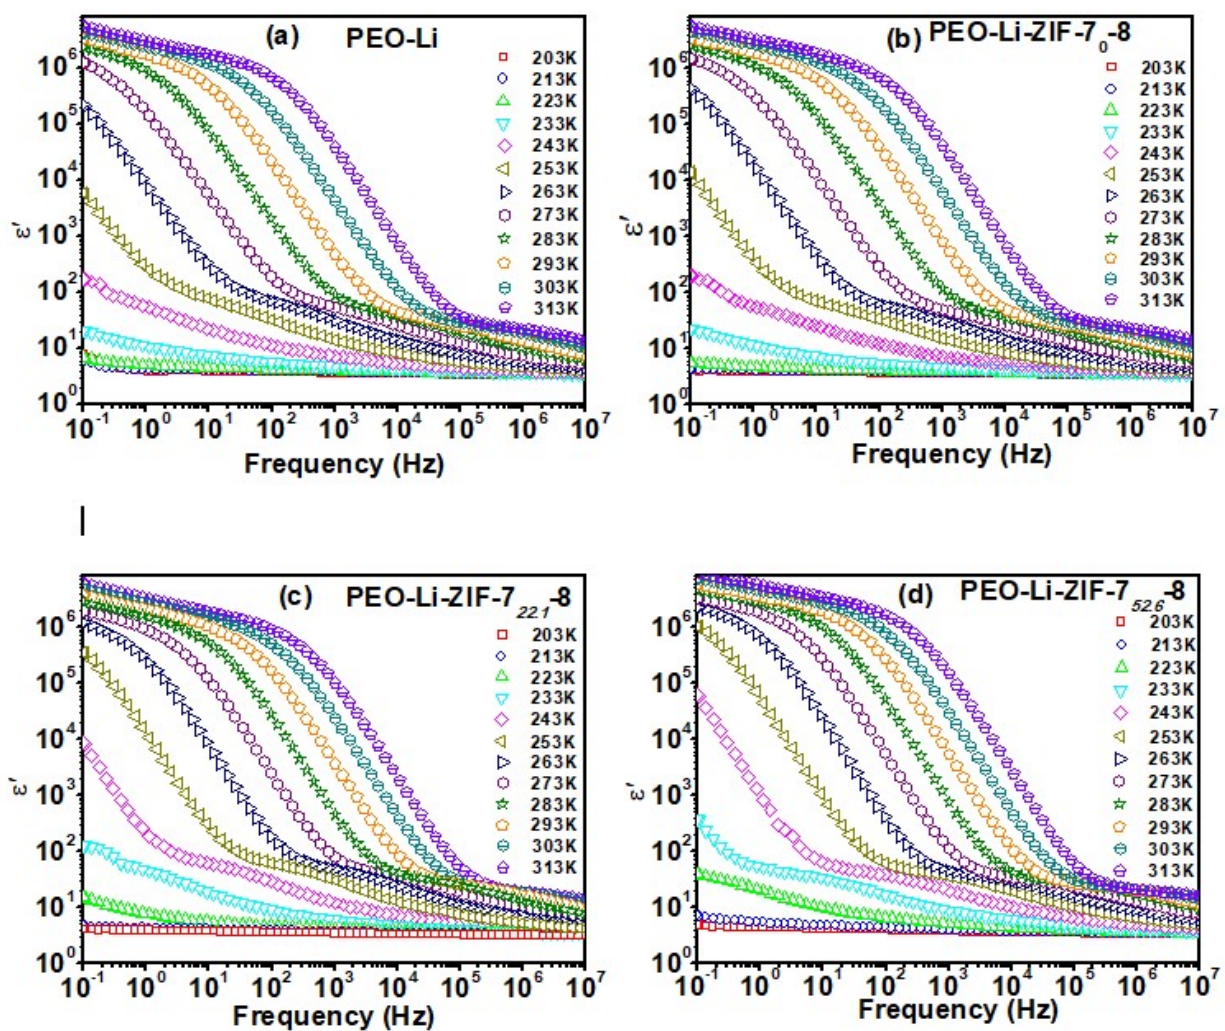

**Figure S6.** Real part ( $\epsilon'$ ) of the complex permittivity for (a) PEO-Li (b) PEO-Li-ZIF-7<sub>0</sub>-8 (c) PEO-Li-ZIF-7<sub>22.1</sub>-8 (d) PEO-Li-ZIF-7<sub>52.6</sub>-8.

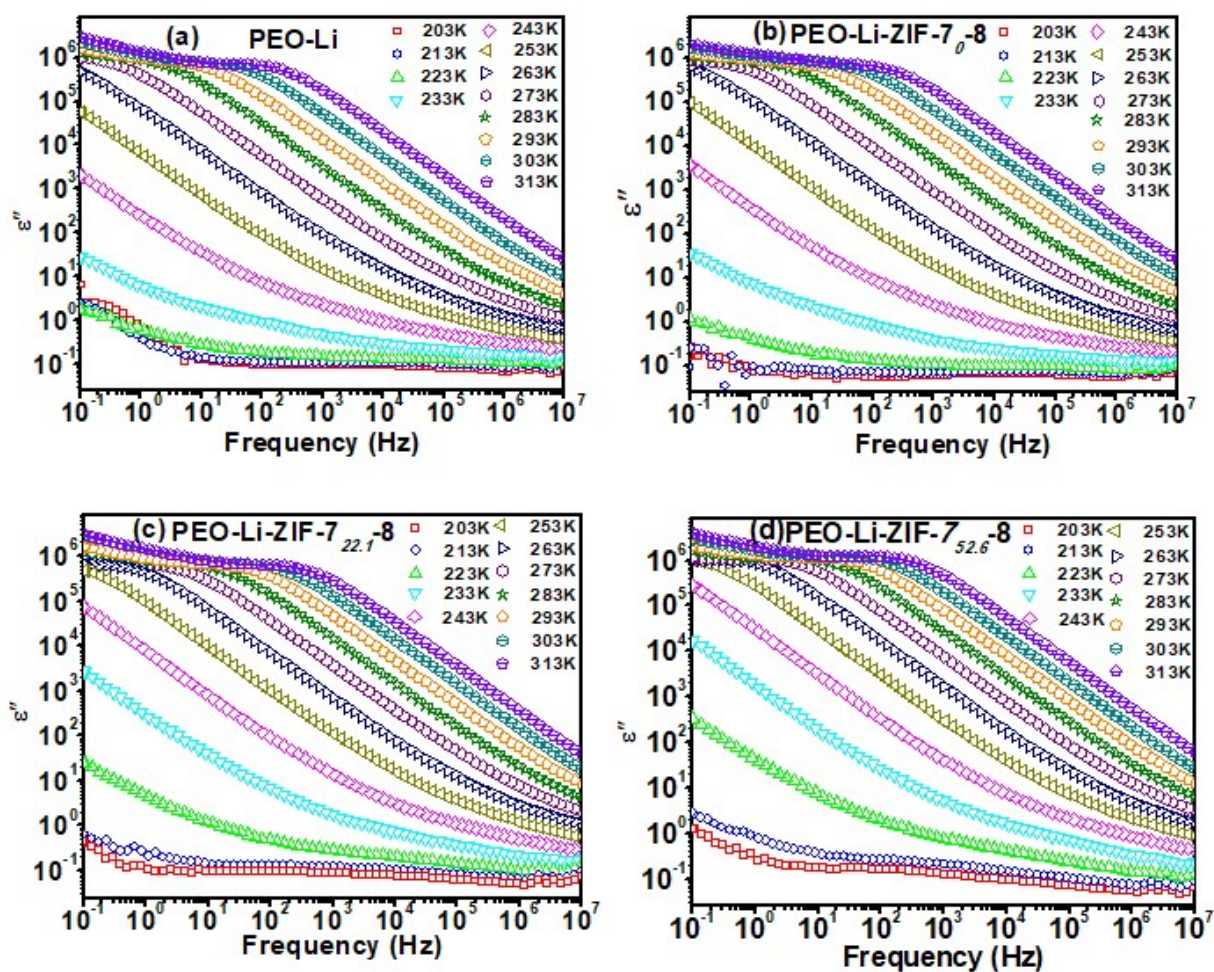

**Figure S7.** Imaginary part ( $\epsilon''$ ) of the complex permittivity for (a) PEO-Li (b) PEO-Li-ZIF-7<sub>0</sub>-8 (c) PEO-Li-ZIF-7<sub>22.1</sub>-8 (d) PEO-Li-ZIF-7<sub>52.6</sub>-8

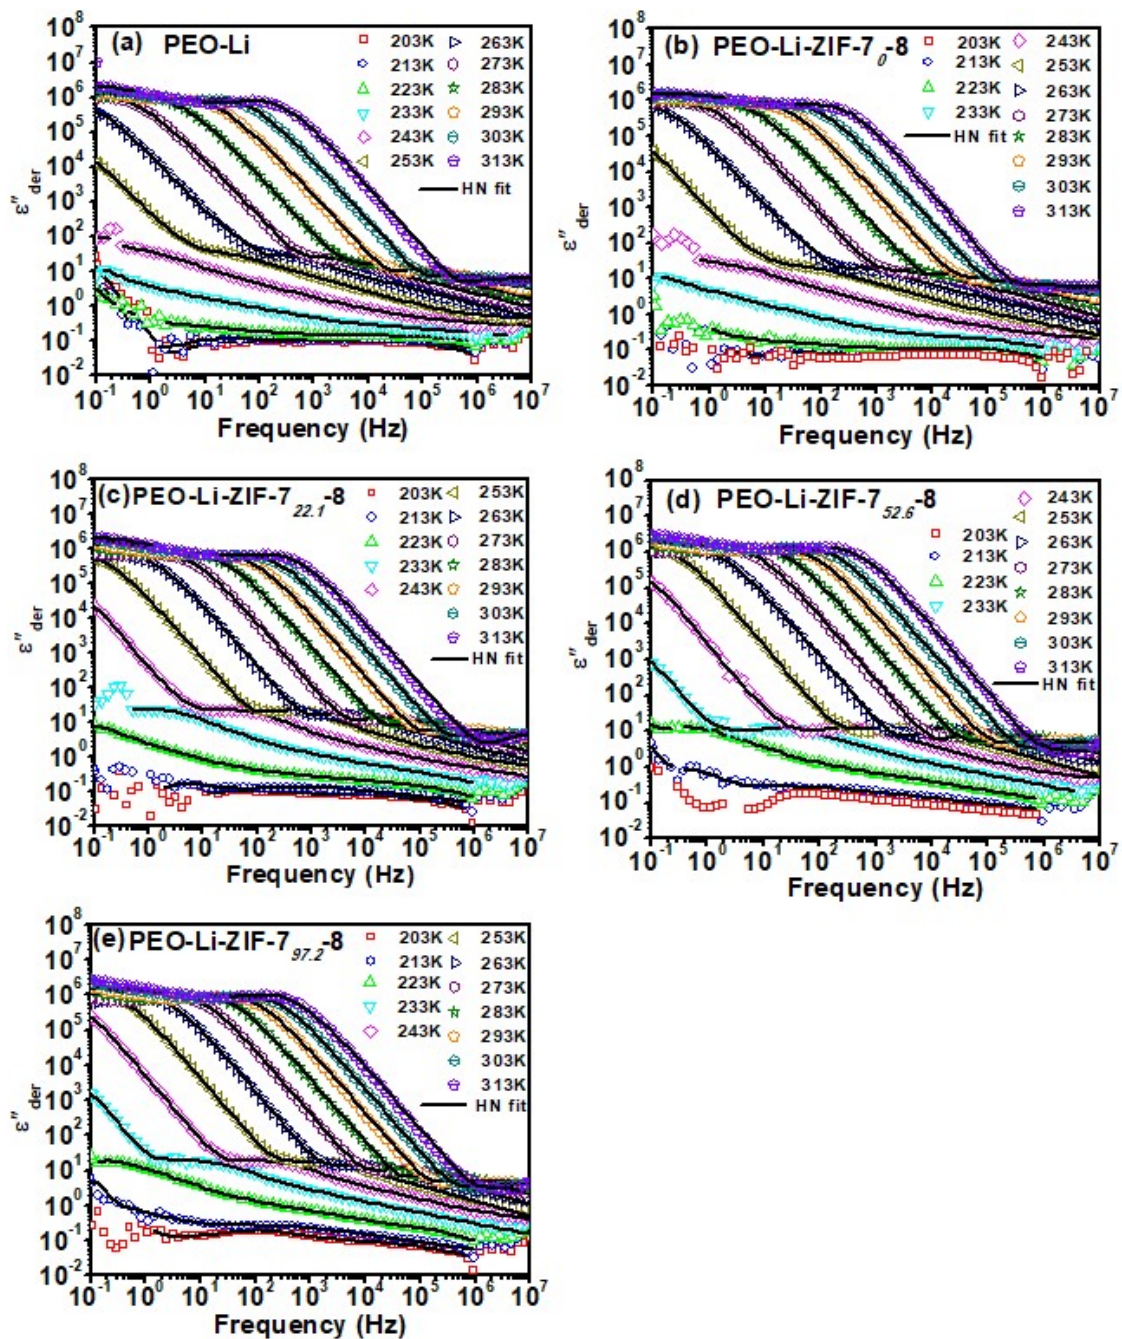

**Figure S8.** dc conduction free dielectric permittivity for (a) PEO-Li (b) PEO-Li-ZIF-7<sub>0</sub>-8 (c) PEO-Li-ZIF-7<sub>22.1</sub>-8 (d) PEO-Li-ZIF-7<sub>52.6</sub>-8 (e) PEO-Li-ZIF-7<sub>97.2</sub>-8. Solid lines show the fit of experimental data using HN formalism.



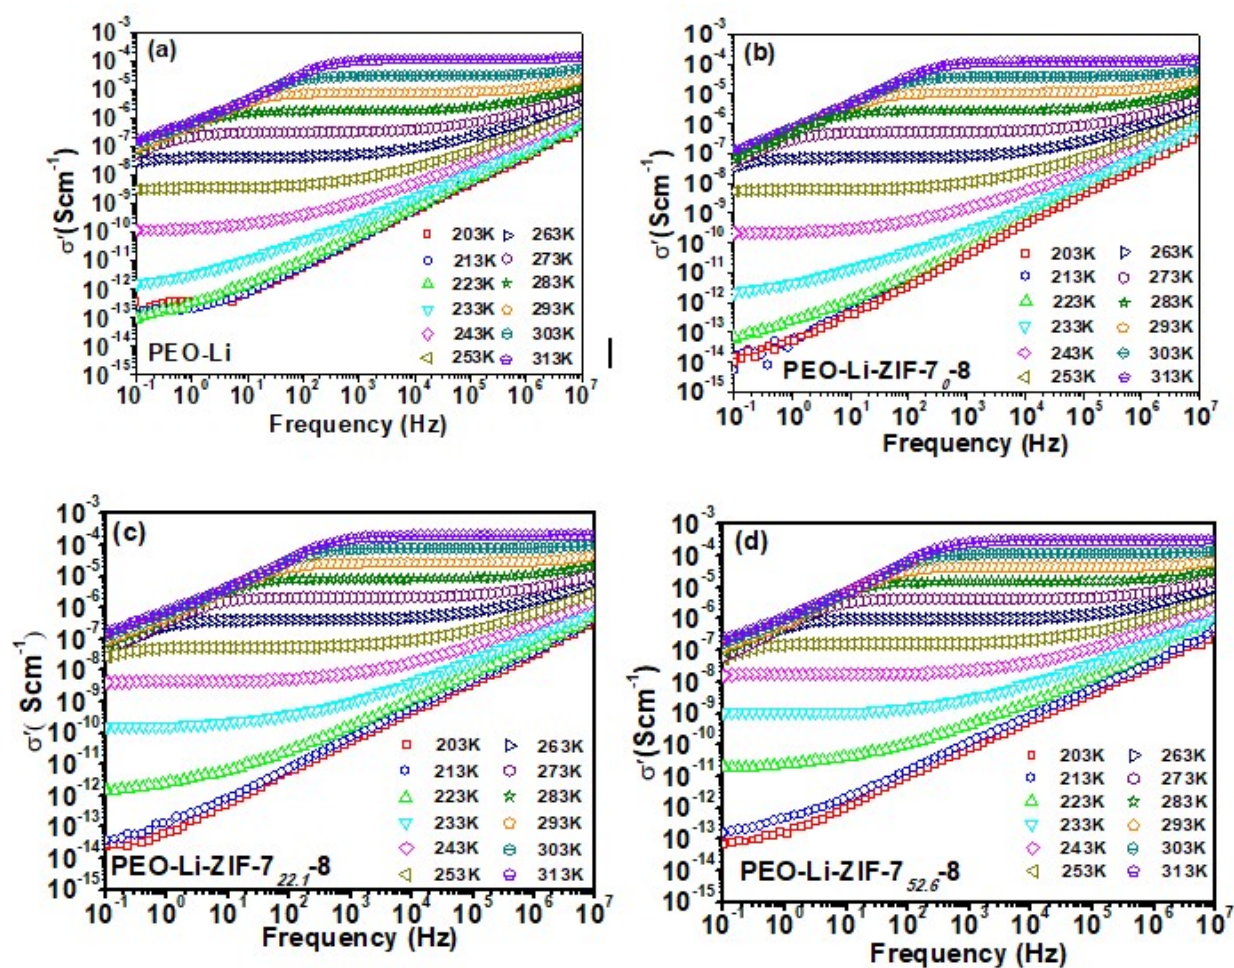

**Figure S9.** Real part ( $\sigma'$ ) of the complex conductivity for (a) PEO-Li (b) PEO-Li-ZIF-7<sub>0</sub>-8 (c) PEO-Li-ZIF-7<sub>22.1</sub>-8 (d) PEO-Li-ZIF-7<sub>52.6</sub>-8 QSSEs.

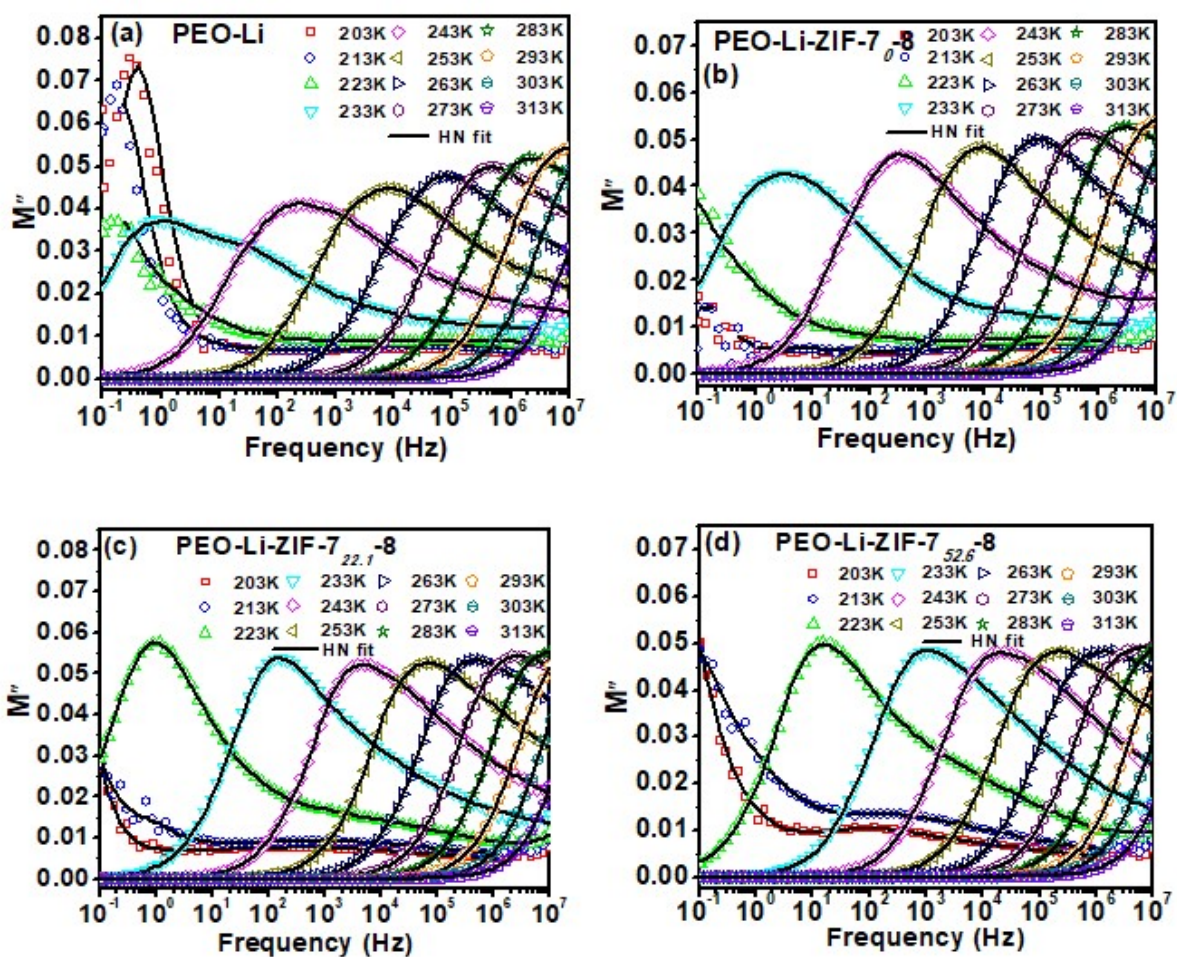

**Figure S10.** Imaginary part of modulus,  $M''$ , variation with frequency for (a) PEO-Li (b) PEO-Li-ZIF-7<sub>0-8</sub> (c) PEO-Li-ZIF-7<sub>22.1-8</sub> (d) PEO-Li-ZIF-7<sub>52.6-8</sub>

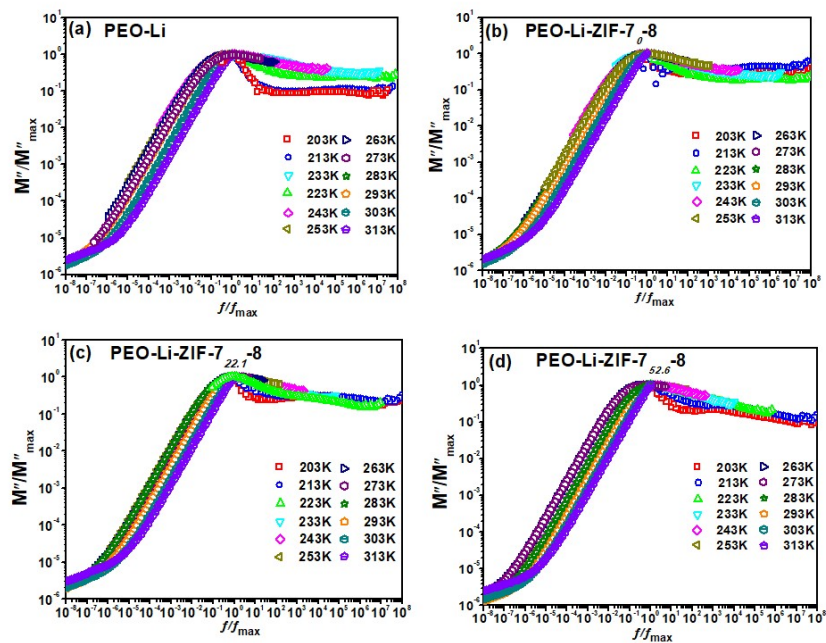

**Figure S11.** Master curve by maxima normalization technique (a) PEO-Li (b) PEO-Li-ZIF-7<sub>0</sub>-8 (c) PEO-Li-ZIF-7<sub>22.1</sub>-8 (d) PEO-Li-ZIF-7<sub>52.6</sub>-8..
